# Visual speech is processed differently in auditory and visual cortex: evidence from MEG and partial coherence analysis

Abbreviated title: Speech processing in auditory and visual cortex

Máté Aller<sup>1</sup>, Heidi Solberg Økland<sup>1</sup>, Lucy J. MacGregor<sup>1</sup>, Helen Blank<sup>2</sup>, Matthew H. Davis<sup>1</sup>

<sup>1</sup>MRC Cognition and Brain Sciences Unit, University of Cambridge, Cambridge, UK

<sup>2</sup>University Medical Center Hamburg-Eppendorf, Hamburg, Germany

Corresponding Author: Máté Aller <mate.aller@mrc-cbu.cam.ac.uk>

Conflict of interest statement: The authors declare that no competing interests exist.

## Acknowledgements:

This work was supported by MRC funding of the Cognition and Brain Sciences Unit, supporting MA, LJM, HB, MHD (SUAG/044 G101400). HSØ was supported by a PhD award from the Cambridge Trusts. We would like to thank Clare Cook and Saskia Helbling for their assistance with data collection, Gemma Crickmore and Simon Strangeways for their assistance in recording and editing the speech stimuli.

## Author Contributions:

Conceptualization: HSØ, HB, and MHD; Methodology: HSØ and MHD; Software: MA, LJM and HSØ; Formal Analysis: MA, HSØ and MHD; Investigation: HSØ, MHD; Resources: MHD; Data Curation: MA and HSØ; Writing - Original Draft: MA and MHD; Writing - Review & Editing: MA, HSØ, LJM, HB and MHD; Visualization: MA and MHD; Supervision: MHD; Funding Acquisition: MHD, HSØ.

## Abstract

Speech perception in noisy environments is enhanced by seeing facial movements of communication partners. However, the neural mechanisms by which audio and visual speech are combined are not fully understood. We explore MEG phase locking to auditory and visual signals in MEG recordings from 14 human participants (6 female) that reported words from single spoken sentences. We manipulated the acoustic clarity and visual speech signals such that critical speech information is present in auditory, visual or both modalities. MEG coherence analysis revealed that both auditory and visual speech envelopes (auditory amplitude modulations and lip aperture changes) were phase-locked to 2-6Hz brain responses in auditory and visual cortex, consistent with entrainment to syllable-rate components. Partial coherence analysis was used to separate neural responses to correlated audio-visual signals and showed non-zero phase locking to auditory envelope in occipital cortex during audio-visual (AV) speech. Furthermore, phase-locking to auditory signals in visual cortex was enhanced for AV speech compared to audio-only (AO) speech that was matched for intelligibility. Conversely, auditory regions of the superior temporal gyrus (STG) did not show above-chance partial coherence with visual speech signals during AV conditions, but did show partial coherence in VO conditions. Hence, visual speech enabled stronger phase locking to auditory signals in visual areas, whereas phase-locking of visual speech in auditory regions only occurred during silent lip-reading. Differences in these cross-modal interactions between auditory and visual speech signals are interpreted in line with cross-modal predictive mechanisms during speech perception.

## 51 Significance Statement

52 Verbal communication in noisy environments is challenging, especially for hearing-impaired  
53 individuals. Seeing facial movements of communication partners improves speech perception when  
54 auditory signals are degraded or absent. The neural mechanisms supporting lip-reading or audio-visual  
55 benefit are not fully understood. Using MEG recordings and partial coherence analysis we show that  
56 speech information is used differently in brain regions that respond to auditory and visual speech.  
57 While visual areas use visual speech to improve phase-locking to an auditory component of speech,  
58 auditory areas do not show phase-locking to visual speech unless auditory speech is absent and visual  
59 speech is used to substitute for missing auditory signals. These findings highlight brain processes that  
60 combine visual and auditory signals to support speech understanding.

61

## 62 Introduction

63 Speech is the most important form of human communication and understanding speech in face-to-  
 64 face conversation is a key part of that skill. Many types of adverse listening conditions decrease speech  
 65 intelligibility, such as listening to a speaker with a foreign accent, in the presence of background noise  
 66 or with a hearing impairment (see Mattys et al., 2012 for a review). Seeing the face of the conversation  
 67 partner benefits speech comprehension in all such adverse conditions, both in healthy people and  
 68 those with hearing impairment (Sumbly and Pollack, 1954; Erber, 1975; Summerfield et al., 1992). Yet,  
 69 the neural mechanisms of this benefit are still not fully understood. Behavioural evidence suggests  
 70 that mouth movements are the main carrier of visual speech information. For example, eye-tracking  
 71 demonstrates that listeners fixate the mouth more often when speech is harder to understand (Yi et  
 72 al., 2013) and selective masking of oral movements is detrimental to comprehension (Thomas and  
 73 Jordan, 2004). Furthermore, people with better silent lip reading ability benefit more from visual  
 74 speech when listening to audio-visual speech (MacLeod and Summerfield, 1987).

75 Extensive research indicates that neural activity in auditory cortex synchronizes, or entrains (in a broad  
 76 sense, see Obleser and Kayser, 2019), to temporally regular stimuli (Lakatos et al., 2005). Importantly,  
 77 several studies demonstrated neural entrainment to auditory speech signals including their temporal  
 78 envelope (Giraud and Poeppel, 2012; Peelle and Davis, 2012; Gross et al., 2013; Peelle et al., 2013;  
 79 Ding and Simon, 2014). Additionally, there is close temporal correspondence between the auditory  
 80 (acoustic envelope) and visual (lip aperture area) components of speech (Chandrasekaran et al., 2009).  
 81 The prediction follows, that neural responses also track visual speech signals. Indeed, neural responses  
 82 entrain to speakers' lip movements in various listening situations: clear audio-visual speech from a  
 83 single speaker (Luo et al., 2010; Micheli et al., 2020; Mégevand et al., 2020), clear audio-visual speech  
 84 from multiple speakers (Zion Golumbic et al., 2013; Park et al., 2016), silent visual-only speech  
 85 (O'Sullivan et al., 2017; Hauswald et al., 2018; Bourguignon et al., 2020; Nidiffer et al., 2021), and  
 86 audio-visual speech-in-noise (Keitel et al., 2018). Here, we investigated how visual and auditory speech

signals are combined to support comprehension without segregation of speech and background noise. We used noise-vocoded speech (Shannon et al., 1995) which is a form of intrinsic speech degradation with reduced spectral detail similar to that conveyed to hearing impaired individuals using a cochlear implant. Understanding such degraded speech is challenging even when a single sound source is present and is improved by visual speech. We hypothesized a mechanism by which such improvement can occur whereby neural entrainment to visual speech facilitates neural phase locking to degraded auditory speech (Peelle and Sommers, 2015).

Participants listened to audio-visually presented sentences and repeated as many words as they could in each sentence. We factorially manipulated the acoustic clarity of the sentences (high vs. low) using noise vocoding and the availability of visual speech (present vs. absent). This enabled us to assess how neural phase-locking to speech changes in response to increased sensory detail emanating from different sensory modalities (i.e., auditory or visual). To measure neural phase-locking to speech signals we collected magnetoencephalography (MEG) recordings and computed their phase coherence with i) the acoustic envelope of the auditory speech signal and ii) the time course of the instantaneous area of the speakers' lip aperture (visual speech envelope) extracted from the sentence stimuli.

We replicated previous results showing that auditory and visual coherence effects emerge predominantly in temporal and occipital areas, respectively. We go beyond these by using partial coherence analysis to assess entrainment to auditory envelope signals in visual cortex and vice-versa for visual envelope signals in auditory regions. Given the previously shown coherence of auditory and visual speech signals, partial coherence analysis allows tests for true cross-modal influences in which additional neural variance is explained by auditory signals over and above entrainment to the visual input (and vice-versa).

## Materials and Methods

### Participants

Seventeen right-handed participants took part in the study after giving informed written consent. One participant did not finish the experiment and data from two participants were excluded because: (1) they were subsequently revealed to not be a native speaker of English or (2) data showed excessive MEG artefacts. The remaining 14 participants (6 females, mean age  $\pm$  SD = 28  $\pm$  7 years) were native speakers of British English and had no history of hearing impairment or neurological diseases based on self-report. The experiment was approved by the Cambridge Psychology Research Ethics Committee and was conducted in accordance with the Declaration of Helsinki.

### Experiment design

Participants watched and listened to video clips of a speaker producing single sentences. We manipulated acoustic clarity (high vs. low) using noise vocoding (see Stimuli and procedure) and the availability of visual speech (present or absent) in a 2 x 2 factorial design resulting in 4 conditions: audio-only high clarity (AO<sub>high</sub>), audio-only low clarity (AO<sub>low</sub>), audio-visual high clarity (AV<sub>high</sub>) and audio-visual low clarity (AV<sub>low</sub>). A fifth condition with silent visual-only speech (VO) was also included (Fig. 1A).

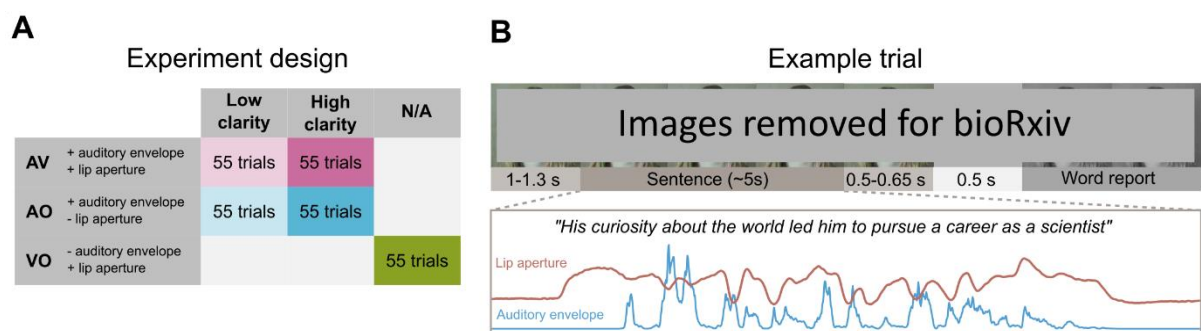

**Figure 1.** Experiment design and example trial. **A.** Experiment design. **B.** Trial diagram showing the order and timing of events in a representative trial (top). Time course of the extracted auditory (acoustic envelope) and visual speech signals (lip aperture area) for an example sentence (bottom).

## Stimuli and procedure

A total of 275 meaningful sentences were used ranging in length from 8 to 21 words (mean  $\pm$  SD =  $14.0 \pm 1.9$ ) and in duration from 3.72 to 7.02 s (mean  $\pm$  SD =  $5.13 \pm 0.59$ ). All were produced by a female native speaker of British English and recorded using a digital video camera (Panasonic AG-AF101 HD) and external microphone (RØDE NTG2 Shotgun). Video and audio were digitized at 48 kHz, 16 bit and edited using Adobe Premiere Pro CS6, Adobe Audition 3.0, Praat (<https://www.fon.hum.uva.nl/praat/>), and Matlab (MathWorks Inc.). The video clips depicted the speaker's face in front of a neutral background (see Fig. 1B). Video clips of 55 different sentences were presented in each of the 5 conditions (AO<sub>high</sub>, AO<sub>low</sub>, AV<sub>high</sub>, AV<sub>low</sub>, and VO) in random order. Each of the sentences was presented once for each participant and the particular sentences assigned to each condition were randomized across participants.

The availability of visual speech was manipulated by either including the video of the speaker producing the actual sentences (visual speech present) or including a video of the face of the speaker while they were not speaking (visual speech absent). Acoustic clarity was manipulated using noise vocoding (Shannon et al., 1995), based on a protocol used in a previous experiment (Zoefel et al., 2020). Briefly, the speech signal was first filtered into 16 logarithmically spaced frequency bands between 70 and 5000 Hz, and the amplitude envelopes were extracted for each band (half-wave rectified, low-pass filtered below 30 Hz). The envelope for each of those frequency bands,  $env(b)$ , was then mixed with the broadband envelope,  $env(broadband)$ , of the same speech signal in proportion  $p$ , to yield an envelope for each frequency band  $env_{final}(b)$ .

$$env_{final}(b) = env(b) * p + env(broadband) * (1 - p) \quad (1)$$

The envelopes were then used to modulate white noise in their respective frequency bands and the resulting signals were recombined. If  $p = 0$ , then each of the narrowband envelopes become identical to the broadband envelope, hence the resulting signal is equivalent to 1-channel vocoded speech, which is unintelligible (Peelle et al., 2013). Conversely, if  $p = 1$ , the resulting signal is equivalent to

16-channel vocoded speech which is fully intelligible (Peelle et al., 2013). This procedure enabled more precise control over acoustic clarity than achieved by changing the number of vocoder channels (see Zoefel et al., 2020 for another use of this method). In our experiment we used  $p = 0.2$  and  $p = 0.7$  for the low and high acoustic clarity conditions, respectively. The exact values for  $p$  were determined in a separate pilot experiment such that the mean word report accuracy across participants was at an intermediate value (around 50% word report) and listeners achieved approximately equal word report accuracy in  $AO_{\text{high}}$  and  $AV_{\text{low}}$  conditions. In the visual-only condition the silent video of the speaker producing the sentence was presented.

Stimuli were delivered using Psychtoolbox version 3 (Brainard, 1997; Kleiner et al., 2007) running on Matlab 2014a. Each trial started with a fixation period where the non-speaking face of speaker was presented. After a delay of 1-1.3 s (uniformly sampled from 1, 1.1, 1.2 or 1.3 s) the sentence was presented, followed by a variable fixation period of 0.5-0.65 s (uniformly sampled from 0.5, 0.55, 0.6 and 0.65 s). Finally, participants were prompted by a brief (0.5 s) response cue to report verbally as many words as they could comprehend from the sentence or say “I don’t know” if they could not identify any words (Fig. 1B). The trial ended when participants pressed a button with their right hand indicating that they had finished speaking. Participants were instructed to fixate on the speaker’s face throughout the experiment. Participants received a short period of behavioural practice to familiarize themselves with vocoded speech at different levels of acoustic clarity. Sentence presentation was paired with a written transcription of each sentence to ensure efficient perceptual learning (Davis et al., 2005). They also practiced the word report task for vocoded speech before the main MEG experiment.

## Data acquisition and pre-processing

The verbal word report responses were audio recorded for off-line transcription. The transcription and word report accuracy scoring were done semi-automatically using custom python code. First, the verbal responses were processed with a speech recognition algorithm (python SpeechRecognition



library; <https://pypi.org/project/SpeechRecognition/>) and the transcribed responses were manually checked. Then, for each sentence, the transcribed responses were compared to the corresponding original sentences using custom python code. The word report accuracy score was computed as the percentage of words correctly recognized irrespective of word order and averaged across sentences within each of the 5 conditions ( $AO_{high}$ ,  $AO_{low}$ ,  $AV_{high}$ ,  $AV_{low}$ , and VO) separately for each participant.

Magnetic fields were recorded with a VectorView system (Elekta Neuromag) containing a magnetometer and two orthogonal planar gradiometers at each of 102 positions within a hemispheric array. Electric potentials were simultaneously recorded using 70 Ag/AgCl sensors according to the extended 10–10 system (EasyCap) and referenced to a sensor placed on the nose. All data were digitally sampled at 1 kHz and filtered between 0.03–330 Hz. Head position and EOG activity were continuously monitored using four head position indicator (HPI) coils and two bipolar electrodes, respectively. A 3D digitizer (Polhemus Fastrak) was used to record the positions of the EEG sensors, HPI coils, and ~70 additional points evenly distributed over the scalp, relative to three anatomical fiducial points (the nasion and left and right pre-auricular points). Data from EEG sensors were not analysed further. Data from the MEG sensors (magnetometers and gradiometers) were processed using the temporal extension of Signal Source Separation (tSSS; Taulu and Simola, 2006) as implemented in Maxfilter 2.2 (Elekta Neuromag) to suppress noise sources, compensate for head movements, and interpolate any sensors that generated poor quality data. Finally, a band stop filter at 50 Hz was applied and the data were downsampled to 250 Hz. Further processing was performed using MNE-Python (Gramfort et al., 2013) and FieldTrip (Oostenveld et al., 2011). For each participant, data were concatenated across the 5 recording blocks. To reduce the influence of eye movement and cardiac activity related artefacts, an independent component analysis (ICA, FastICA method Hyvarinen, 1999) was performed. Before ICA fitting, the data were filtered between 1–45 Hz, whitened (decorrelated and scaled to unit variance), and their dimensionality reduced by means of principal component analysis (PCA). The first  $n$  PCA components explaining the cumulative variance of 0.9 of the data were entered in the ICA decomposition. The computed ICA filters were applied on the

concatenated raw data. Between-participant differences in head position were compensated for by transforming MEG data from each participant to the mean sensor array across participants using MaxFilter 2.2. Finally, epochs were extracted time locked to the onset of the speaker's mouth movement (0-5 s).

To measure neural phase coherence with auditory and visual speech, we created two speech signals from each of the stimulus video clips: (i) the acoustic envelope of the auditory speech and (ii) the time course of the instantaneous area of the speakers' lip aperture (Fig. 1B). For each sentence, the amplitude envelope of the auditory speech signal was extracted using custom Matlab code following a standard sequence of steps similar to noise vocoding: full wave rectification and low-pass filtering at 30 Hz. The lip aperture envelope of the speaker was computed using custom Matlab code from (Park et al., 2016). Briefly, for each frame, the lip contour of the speaker was extracted and the area within the lip contour was calculated. To match the amplitude and sampling rate of the auditory and visual speech envelopes to the MEG signal, they were scaled by a factor of  $10^{-10}$  and  $10^{-15}$  respectively and resampled to 250 Hz.

For each participant, high-resolution structural MRI images (T1-weighted) were obtained using a GRAPPA 3-D MPRAGE sequence (resolution time = 2250 msec, echo time = 2.99 msec, flip angle =  $9^\circ$ , and acceleration factor = 2) on a 3T Tim Trio MR scanner (Siemens) with  $1 \times 1 \times 1$  mm isotropic voxels. MRI images were segmented with FreeSurfer (Fischl, 2012) using the default parameter settings.

## Speech signal analysis and statistics

To relate the auditory envelope (i.e., the broadband acoustic speech envelope) to the lip aperture envelope (i.e., the visual component of speech), we computed their coherence. First, the data were transformed to frequency domain using a fast Fourier transform (FFT) applied to the entire auditory and visual speech signals using a Hanning window, producing spectra with a frequency resolution of 0.5 Hz between 0.5 and 20 Hz. Then, the cross-spectral density was computed between the two signals. Finally, the coherence was computed between the two signals  $i$  and  $j$  for each frequency  $f$  as

the magnitude of the cross-spectral density (*CSD*) divided by the square root of the power spectra of both signals:

$$Coh_{i,j}(f) = \frac{|CSD_{i,j}(f)|}{\sqrt{Pow_i(f) Pow_j(f)}} \quad (2)$$

We fitted a linear function to the log-log transformed power spectra of the auditory and visual speech signals to illustrate their natural  $1/f$  noise profile (Fig. 2A, Chandrasekaran et al., 2009).

We performed permutation tests to establish at which frequencies the auditory and visual speech signals were coherent. We randomly permuted the assignment of auditory and visual speech signals 5000 times generating a null distribution of permuted coherence values. Then, for each frequency, we computed the proportion of permuted coherence values greater than the observed coherence value (Fig. 2B) equivalent to a one-tailed p-value. To control for multiple comparisons across frequencies, we applied Bonferroni correction.

## Behavioural data analysis and statistics

Word report accuracies for each participant were entered in a 2 (acoustic clarity high vs. low) x 2 (visual speech present vs. absent) repeated measures ANOVA and the main effects of acoustic clarity and availability of visual speech were reported (Fig. 2C). We also computed the Pearson correlation between word report accuracy in VO condition (as an index of lip reading ability) and the word report accuracy difference between  $AV_{low}$  and  $AO_{high}$  conditions (expressing the relative benefit that participants received from providing ‘visual’ or ‘auditory’ speech signals compared to the most difficult  $AO_{low}$  condition). Importantly these two methods are independent under the null hypothesis and show considerable variation across participants (Fig. 2D).

To test the distribution of the visual preference index for unimodality, we computed Hartigan’s dip statistic (Hartigan and Hartigan, 1985) and its corresponding p-value. The dip statistic expresses the maximum distance between the empirical distribution and the best fitting unimodal distribution on a

scale between 0 and 1. The null hypothesis of the test is unimodal distribution; hence a significant test statistic is interpreted as evidence for non-unimodal, i.e., at least bimodal distribution.

## MEG data analysis and statistics

To measure neural phase coherence with auditory and visual speech at the sensor level, we computed the coherence between the magnetometers and the auditory and visual speech signals, respectively, in line with previous studies (Peelle et al., 2013). This analysis was conducted to establish MEG-auditory (i.e., between neural and auditory envelope) and MEG-visual coherence effects (i.e., coherence between the neural signal and visual envelope). Basic MEG-auditory and MEG-visual coherence was established in analyses including all conditions with an auditory (i.e.,  $AO_{high}$ ,  $AO_{low}$ ,  $AV_{high}$ ,  $AV_{low}$ ) or visual signal (i.e.,  $AV_{high}$ ,  $AV_{low}$ ,  $VO$ ), respectively. Coherence was computed between 1-20 Hz at 1 Hz increments. For each participant, we also computed the coherence for 100 random pairings of auditory/visual and neural data, making sure that none of the auditory/visual signals were paired with their original neural signal pair. These permutations were then averaged for each participant to produce coherence maps which provide an estimate of the baseline coherence values that can be expected by chance. The difference between this permuted coherence measure and observed coherence for the true pairing of auditory/visual signals and neural responses is normally distributed, no longer bounded between 0 and 1 and is expected to be zero under the null hypothesis of no coherence between sensory and neural signals. This is a more suitable dependent variable for statistical tests and hence we report the difference between true and permuted coherence in all analyses. We performed cluster-based non-parametric permutation tests (Maris and Oostenveld, 2007) to test if there is reliable coherence to auditory and/or visual speech above chance (i.e., true - permuted coherence > 0). The frequency range of the test was restricted to frequencies exhibiting greater-than-chance coherence between the auditory and visual envelopes, (i.e., 2-8 Hz, see Figure 2B and results).

Source space analysis was performed in MNE-Python (Gramfort et al., 2013). For each participant, MEG sensor positions were co-registered with the individual MRI images and visually verified. The forward solution was computed using a one-layer boundary element model (BEM) based on each participant's inner skull mesh obtained from the FreeSurfer segmentation of individual anatomical MRI images. We used dynamic imaging of coherent sources (DICS, Gross et al., 2001) to determine the spatial distribution of brain areas coherent to the auditory and visual speech signals (Peelle et al., 2013). Cortico-auditory and cortico-visual coherence source maps were computed at 4096 vertices in each hemisphere, in increments of 0.2 Hz between 2-6 Hz and averaged across frequencies before group statistics. The frequency range was based on the frequency extent of the significant clusters observed in the basic MEG-auditory and MEG-visual coherence effects in sensor space. It has been shown previously that the auditory and visual speech signals are coherent in audio-visual speech (Chandrasekaran et al., 2009), a finding which we also confirmed for our stimulus materials. It is thus possible that some of the observed cortico-auditory coherence effects could be accounted for by the visual signal (e.g., in occipital cortex), and vice-versa for cortico-visual coherence in auditory cortex. To rule out this possibility, we computed partial coherence (Rosenberg et al., 1998) between neural and auditory/visual speech signals (i.e., cortico-auditory coherence after removing coherence explained by the visual signal and cortico-visual coherence after removing coherence explained by the auditory signal) which we once more compared to null distributions based on computing partial coherence for 100 random combinations of auditory/visual and neural data.

To rule out the possibility that our results were biased by imbalanced number of trials between the conditions being compared (e.g., when comparing AV and VO conditions, the latter only included 55 trials, half of the former condition), we re-computed the coherence/partial coherence for the more abundant condition with subsampling. More specifically, we randomly sampled trials from the more abundant condition without replacement to match the number of trials in the less abundant condition and computed the coherence/partial coherence. This procedure was repeated 100 times with a new

random sample of trials, then the resulting coherence or partial coherence values were averaged across the 100 repetitions.

We defined two regions of interest (ROI) based on the anatomical parcellation by (Destrieux et al., 2010): superior temporal gyrus (STG, i.e., lateral aspect of the superior temporal gyrus) and occipital cortex (OCC, including inferior occipital gyrus and sulcus, cuneus, middle and superior occipital gyri, occipital pole, middle and superior occipital sulci, lunatus sulcus, and transverse occipital sulcus). For each participant, true and permuted coherence values were averaged across vertices within each ROI and were entered in group level statistics.

All statistical tests on MEG data were performed at the second, between-subjects level. In the sensor space analysis we used cluster-based non-parametric permutation tests (Maris and Oostenveld, 2007) based on the t-statistic to identify clusters in the 102 channels x 7 frequencies (2-8 Hz) data space that exhibit greater true than permuted coherence between neural and auditory/visual speech signals. These second level tests were based on 5000 permutations, using a cluster-defining threshold of  $p < 0.05$  and a test threshold of  $p < 0.05$ .

For statistical analysis in source space the individual source coherence maps were first morphed onto the average brain provided by FreeSurfer ('fsaverage'). In the whole-brain source analysis we performed the same cluster-based permutation tests. We used a more stringent cluster defining threshold of  $p < 0.005$  for assessing overall cortico-auditory and cortico-visual coherence; this assisted with the clarity of visualisation given the very reliable results shown for this analysis. We used a cluster defining threshold of  $p < 0.05$  with cortico-auditory and cortico-visual coherence after partialling out visual and auditory signals, respectively.

For the ROI analyses we first subtracted the permuted whole-brain partial coherence from the true partial coherence maps in each condition. Then we averaged the vertex-level true-minus-permuted coherence values within each bilateral ROI and performed paired t-tests across participants. We computed a one-tailed p-value when comparing true-permuted partial coherence to 0 as true

coherence is expected to be greater than permuted. For comparisons of true-permuted partial coherence between two conditions, we computed a two-tailed p-value.

## Results

### Audio-visual properties of sentences

First, we characterized the properties of the speech signals in the set of sentence stimuli. We performed a frequency analysis on the auditory and visual speech signals and fitted a  $1/f$  function to the average power spectra across sentences to indicate the expected noise profile (Voss and Clarke, 1975) (Fig. 2A). The residual power spectra showed a maximum between 2-8 Hz consistent with previous findings (Chandrasekaran et al., 2009; Peelle et al., 2013). Previous results also indicated that the auditory and visual speech signals are closely coupled (Chandrasekaran et al., 2009), hence we conducted a coherence analysis between the auditory and visual speech signals (Fig. 2B). The coherence spectrum also shows a clear peak between 2-8 Hz (see shaded area in Fig. 2B). Permutation tests confirmed this observation, concluding that coherence between auditory and visual speech signals was above chance between 2-8 Hz ( $p < 0.05$ , corrected for multiple comparisons). This analysis as well as previous literature informed our subsequent analyses of coherence between neural and speech signals, allowing us to narrow our focus to the frequency range for which audio-visual interactions are expected.

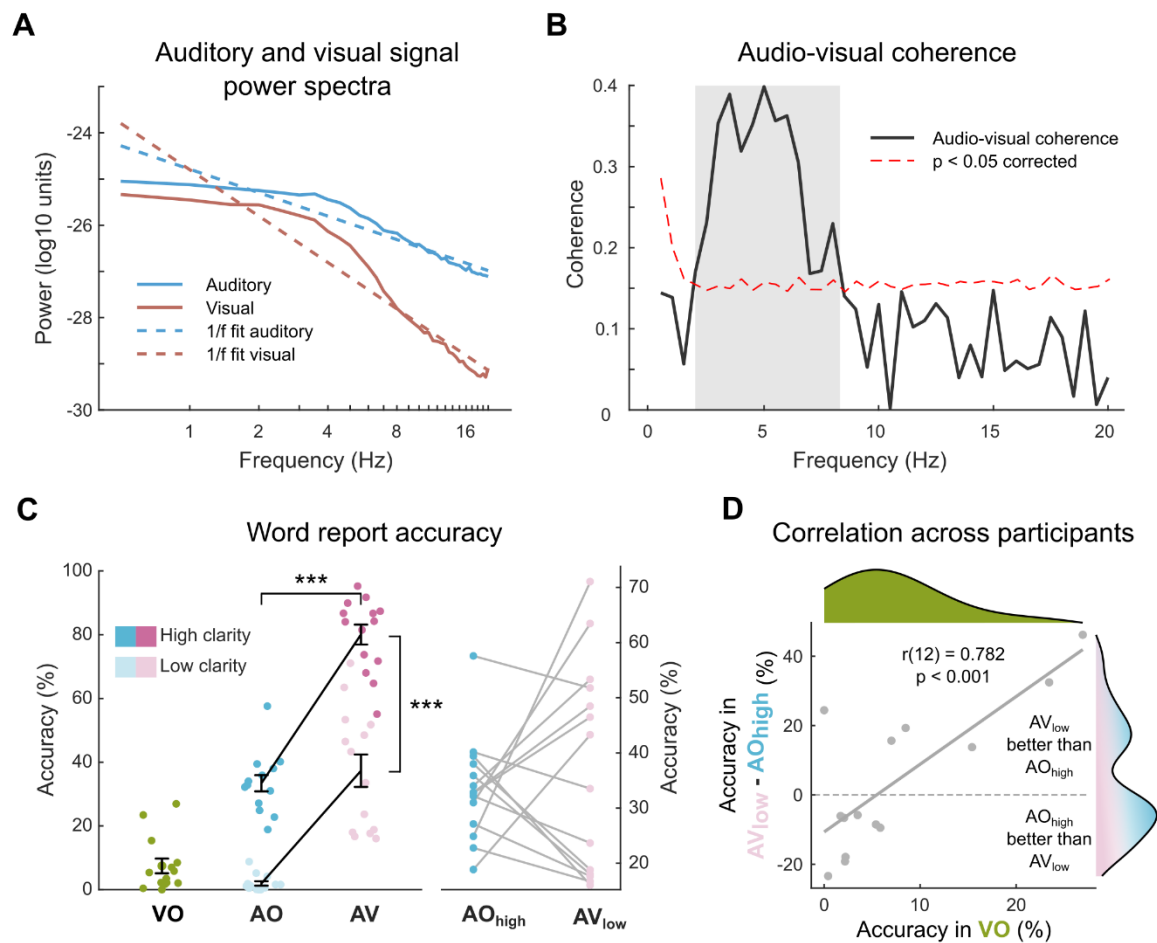

**Figure 2.** Stimulus characteristics and behavioural results. **A.** Power spectra and fitted 1/f noise profiles of auditory and visual speech signals. **B.** Coherence between auditory and visual speech signals across frequencies. Dashed lines indicate significance level, corrected for multiple comparisons, shading indicates 2-8 Hz range with greater-than-chance audio-visual coherence. **C.** Group level word report accuracies (mean  $\pm$  SEM) overlayed with individual data across conditions. The right side of the figure shows the individual differences between AO<sub>high</sub> and AV<sub>low</sub> conditions matched for overall intelligibility. **D.** Correlation across participants between visual preference index (word report difference between AV<sub>low</sub> and AO<sub>high</sub>) and lip reading ability (word report accuracy in VO). Marginal distributions for the two variables are displayed at the top and right hand side, respectively. (AO: audio-only, AV: audio-visual, VO: visual-only, \*\*\*  $p < 0.001$ )



## Behavioural results

We collected and scored participants' word reports for accuracy and computed the average word report accuracies across sentences separately for each condition (Fig. 2C). As expected, word report accuracy was lowest in the AO<sub>low</sub> condition (mean  $\pm$  SEM: 1.95%  $\pm$  0.67%; similar to 1 channel vocoded speech (see Peelle et al., 2013; Sohoglu et al., 2014; Zoefel et al., 2018). Both increased acoustic clarity and visual speech improved word report accuracy as indicated by significant main effects (acoustic clarity: low (mean  $\pm$  SEM): 19.63%  $\pm$  5.99% vs. high (mean  $\pm$  SEM): 56.72%  $\pm$  6.93%,  $F(1,13) = 245.4$ ,  $p < 0.0001$ ; visual speech: AO (mean  $\pm$  SEM): 17.67%  $\pm$  4.64% vs. AV (mean  $\pm$  SEM): 58.68%  $\pm$  7.14%,  $F(1,13) = 344.3$ ,  $p < 0.0001$ ). Their interaction was also significant ( $F(1,13) = 10.4$ ,  $p = 0.0066$ ), but this might reflect non-linearities in the accuracy measure which in some conditions approached maximum and minimum values. Simple effects of acoustic clarity for AO and AV speech, and simple effects of visual speech for high and low clarity speech were all reliable ( $t(13) > 6.6$ ,  $p < 0.0001$ ). Word report accuracy in visual only speech (VO) was also relatively low but showed higher variability than AO<sub>low</sub> (mean  $\pm$  SEM: 7.47  $\pm$  2.28). Importantly, our manipulation of acoustic clarity based on data from a pilot experiment ensured that sentences in AO<sub>high</sub> and AV<sub>low</sub> conditions were approximately equally intelligible (AO<sub>high</sub> (mean  $\pm$  SEM): 33.39%  $\pm$  2.50%; AV<sub>low</sub> (mean  $\pm$  SEM): 37.31%  $\pm$  5.09%). Bayesian paired t-test on word report accuracies between these two conditions provided approximately 3 times stronger evidence in favour of the null-hypothesis of no difference than the alternative ( $t(13) = 0.69$ ,  $p = 0.504$ , BF<sub>01</sub> = 3.02). These conditions therefore enabled us to compare two conditions with different sources of additional speech information (i.e., increased acoustic clarity in AO<sub>high</sub> and low acoustic clarity supported by visual speech in AV<sub>low</sub>) with minimal intelligibility confound (Fig. 2C and D). This analysis revealed marked differences across participants: some benefitted more from the additional visual speech signal than from the increased acoustic clarity (compare lines with positive and negative slopes in Fig. 2C right). We quantified this by computing the difference in word report accuracies between AV<sub>low</sub> and AO<sub>high</sub>. This 'visual preference index' appeared to follow a bimodal distribution (see marginal distributions in Fig. 2D). To confirm our visual observation, we tested the

data for unimodality using Hartigan's dip statistic (Hartigan and Hartigan, 1985), however the results ( $D = 0.0925$ ,  $p = 0.3588$ ) did not provide reliable evidence for non-unimodal distribution perhaps because of our relatively small sample of listeners. Nevertheless, the visual preference index correlated with participant's lipreading ability (as indexed by word report accuracy in VO). The better participants were able to lipread (i.e., report words in silent speech), the more they benefitted from the additional visual speech signal (Pearson's  $r(12) = 0.782$ ,  $p < 0.001$ , Fig. 2D).

### Coherence between neural signals and speech

First, we established the basic coherence between MEG and the auditory/visual speech signals in sensor space. We computed the coherence between signals recorded from each magnetometer and the auditory speech signal in all conditions containing auditory speech signals (i.e.,  $AO_{high}$ ,  $AO_{low}$ ,  $AV_{high}$  and  $AV_{low}$ ), and the coherence between each magnetometer and the visual speech signal in all conditions containing visual speech signals (i.e.,  $AV_{high}$  and  $AV_{low}$ , VO). We also computed the corresponding 'permuted' coherence maps by randomly pairing magnetometer signals with auditory/visual speech signals from other trials (see MEG data analysis for details). This estimated a null distribution for the degree of coherence that can be expected by chance. We contrasted the true and permuted coherence values using a cluster-based permutation test across participants (Maris and Oostenveld, 2007). This analysis revealed that brain responses phase locked to both auditory and visual speech as indicated by significantly above-chance coherence between magnetometer and auditory/visual speech signals (Fig. 3A). The cluster-based permutation tests revealed bilateral clusters phase locked to auditory speech ( $p = 0.0002$ , corrected) and a posterior cluster phase locked to visual speech ( $p = 0.0002$ , corrected), both spanning frequencies between 2-6 Hz (Fig. 3A). Based on these results, we further narrowed our frequency range of interest to 2-6 Hz in subsequent analyses of neural sources.

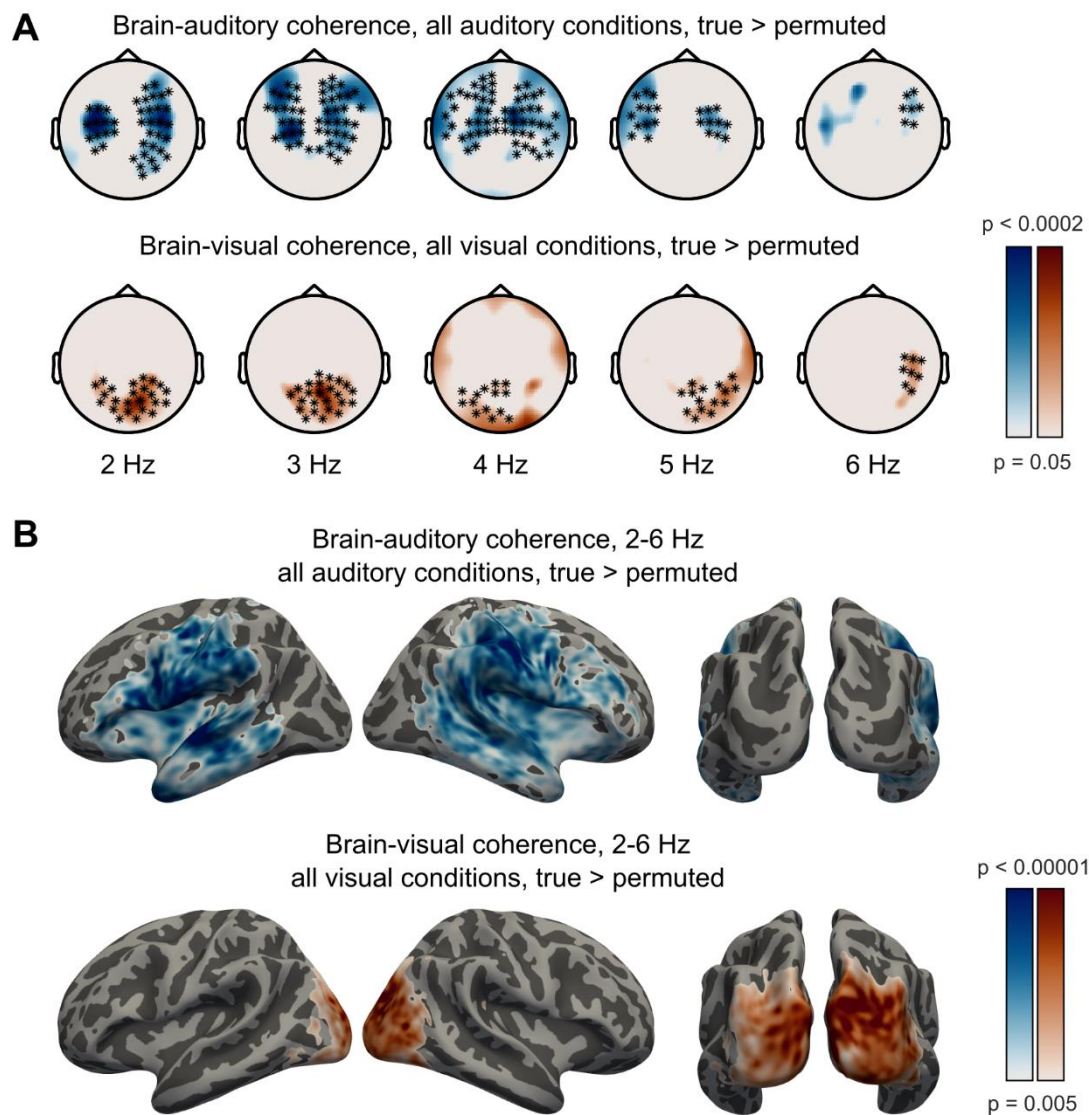

**Figure 3.** Coherence between neural and speech signals. **A.** Sensor topographies show MEG-auditory coherence above permutation-null baseline in all auditory conditions (top) and MEG-visual coherence above baseline in all visual conditions (bottom) across frequencies. Markers show clusters which were statistically significant ( $p = 0.0002$ ) in the cluster-based permutation test (one continuous cluster each, spanning 2-6 Hz for both MEG-auditory and MEG-visual coherence). **B.** Source maps show cortico-auditory coherence above permutation-null baseline in all auditory conditions (top) and cortico-visual coherence above baseline in all visual conditions (bottom) averaged across frequencies between 2-6 Hz. Effects shown are whole-brain cluster corrected ( $p < 0.05$ ) based on cortical sources exceeding a vertex-level threshold of  $p < .005$  (inset colour scale).

To reveal which brain areas phase locked to auditory and visual speech signals, we conducted a whole-brain analysis on source localized MEG responses (Fig. 3B). We performed cluster-based permutation tests on source coherence maps averaged between 2-6 Hz to compare true and permuted coherence between neural and auditory/visual speech signals across participants. We observed greater-than-chance phase coherence with both auditory and visual speech signals as indicated by significant, non-overlapping clusters centred on auditory and visual cortex ( $p < 0.05$ , whole-brain corrected). Bilateral temporal, parietal, and inferior-frontal areas phase locked to auditory speech, whereas bilateral occipital areas phase locked to visual speech.

Next, we investigated which brain areas phase locked more strongly to the auditory than the visual speech signal and vice versa. In this analysis we used only the sentences containing both auditory and visual speech signals (i.e., the AV<sub>high</sub> and AV<sub>low</sub> conditions). Importantly, the auditory and visual speech signals are coherent with each other (Chandrasekaran et al., 2009) (also see Fig. 2B). Hence, to rule out the possibility that the observed neural coherence with one speech signal (e.g., auditory) is explained by the other speech signal (e.g., visual), we computed the partial coherence (Rosenberg et al., 1998), i.e., the neural coherence with the auditory (respectively visual) speech signal after removing influences of the visual signal and vice-versa (see Park et al., 2016, for a similar approach). Figure 4A shows whole-brain maps of auditory > visual and visual > auditory partial coherence effects in AV conditions. Temporal, frontal, and parietal areas were more strongly phase locked to auditory than visual speech, whereas occipital areas were phase locked more strongly to visual than auditory speech, as shown by cluster-based permutation tests ( $p < 0.05$ , whole-brain corrected).

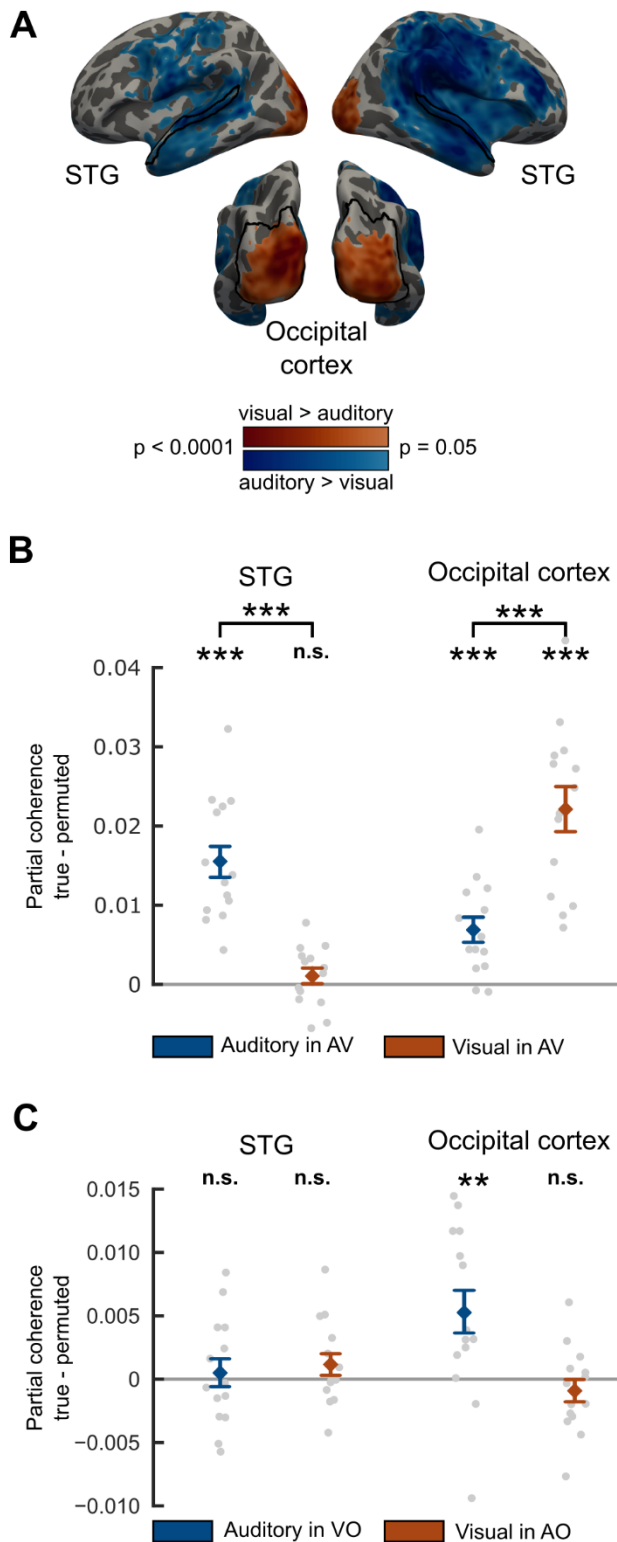

**Figure 4.** Partial auditory and visual coherence in low and high clarity audio-visual conditions ( $AV_{low}$ ,  $AV_{high}$ ). **A.** Whole-brain maps of partial coherence contrasts averaged between 2-6 Hz: auditory > visual and visual > auditory. Effects shown are whole-brain corrected ( $p < 0.05$ ) using a vertex level

threshold of  $p < 0.05$  (see colour scale). Black outlines mark the regions used in the ROI analysis. **B.** Group level auditory and visual partial coherence with respect to the permutation null baseline across ROIs. **C.** Group level auditory partial coherence in silent speech (VO) and visual partial coherence in audio-only speech (AO) with respect to the permutation null baseline across ROIs. Diamond markers and error bars represent mean  $\pm$  SEM over participants, suitable for comparisons with 0, but not for repeated-measures comparisons between conditions. Grey dots represent individual data. (ROI: region of interest, STG: superior temporal gyrus, n.s.: not significant, \*  $p < 0.05$ , \*\*  $p < 0.01$ , \*\*\*  $p < 0.001$ )

Next, we examined auditory and visual phase coherence in auditory and visual cortical areas involved in audio-visual speech processing. We defined two regions of interest (ROI) based on the anatomical parcellation by (Destrieux et al., 2010). For classical visual areas, we defined an occipital cortex ROI covering bilateral occipital areas (for details see MEG data analysis, also Fig. 4A bottom). To define a speech-responsive auditory ROI we used the bilateral superior temporal gyrus (STG, Fig. 4A top). We computed the difference between true and permuted cortico-auditory and cortico-visual partial coherence at each vertex and averaged them across vertices within each ROI. Figure 4B shows the individual partial auditory and visual coherence values with respect to the permutation null baseline across ROIs. As expected, occipital cortex exhibited above chance phase coherence with visual signals as indicated by a significant one-sample t-test of true-permuted partial visual coherence against 0 (mean  $\pm$  SEM =  $0.0221 \pm 0.0028$ ,  $t(13) = 7.801$ , one-tailed  $p < 0.0001$ ). Furthermore, occipital cortex showed stronger phase coherence with visual than auditory speech as indicated by a paired t-test between auditory and visual partial coherence ( $t(13) = 4.469$ , two-tailed  $p = 0.0006$ ). This finding is in line with the overlap shown in Figure 4A between our ROIs, and the clusters of modality-specific partial coherence shown in whole-brain analyses. However, surprisingly, we also observed that occipital cortex phase locked to auditory speech, even when visual coherence was partialled out (mean  $\pm$  SEM =  $0.0069 \pm 0.0016$ ,  $t(13) = 4.379$ , one-tailed  $p = 0.0004$ ). In STG, we similarly observed significant phase coherence with the auditory speech signal (mean  $\pm$  SEM =  $0.0155 \pm 0.0021$ ,  $t(13) = 7.397$ , one-tailed  $p$

465 < 0.0001), and that STG phase locked to auditory speech significantly stronger than visual speech ( $t(13)$   
466 = 6.448, two-tailed  $p < 0.0001$ ). However, in contrast to our findings for visual cortex, we did not find  
467 evidence of significant phase coherence between STG and visual speech once auditory signals were  
468 partialled out (mean  $\pm$  SEM =  $0.0010 \pm 0.0010$ ,  $t(13) = 1.022$ , one-tailed  $p = 0.1627$ ). We also assessed  
469 whether phase-locking to the auditory speech component is observed during silent lip reading (VO  
470 condition) and conversely, whether phase-locking to the visual speech component is observed during  
471 audio-only speech (AO conditions) in our ROIs. Hence, we computed partial auditory coherence in VO  
472 and partial visual coherence in AO conditions with respect to the permutation baseline in STG and  
473 occipital cortex (Fig. 4C). In occipital cortex, we found evidence of phase-locking to auditory speech  
474 signals during responses to silent visual speech (mean  $\pm$  SEM =  $0.0053 \pm 0.0018$ ,  $t(13) = 2.905$ , one-  
475 tailed  $p = 0.0061$ ) but no evidence of responses to visual speech signals in response to audio-only  
476 speech (mean  $\pm$  SEM =  $-0.0009 \pm 0.0009$ ,  $t(13) = -1.011$ , one-tailed  $p = 0.1652$ ). In STG, we did not find  
477 reliable evidence of phase tracking of auditory speech in VO, nor visual speech in AO ( $t(13) < 1.293$ ,  
478 one-tailed  $p > 0.1093$ ).



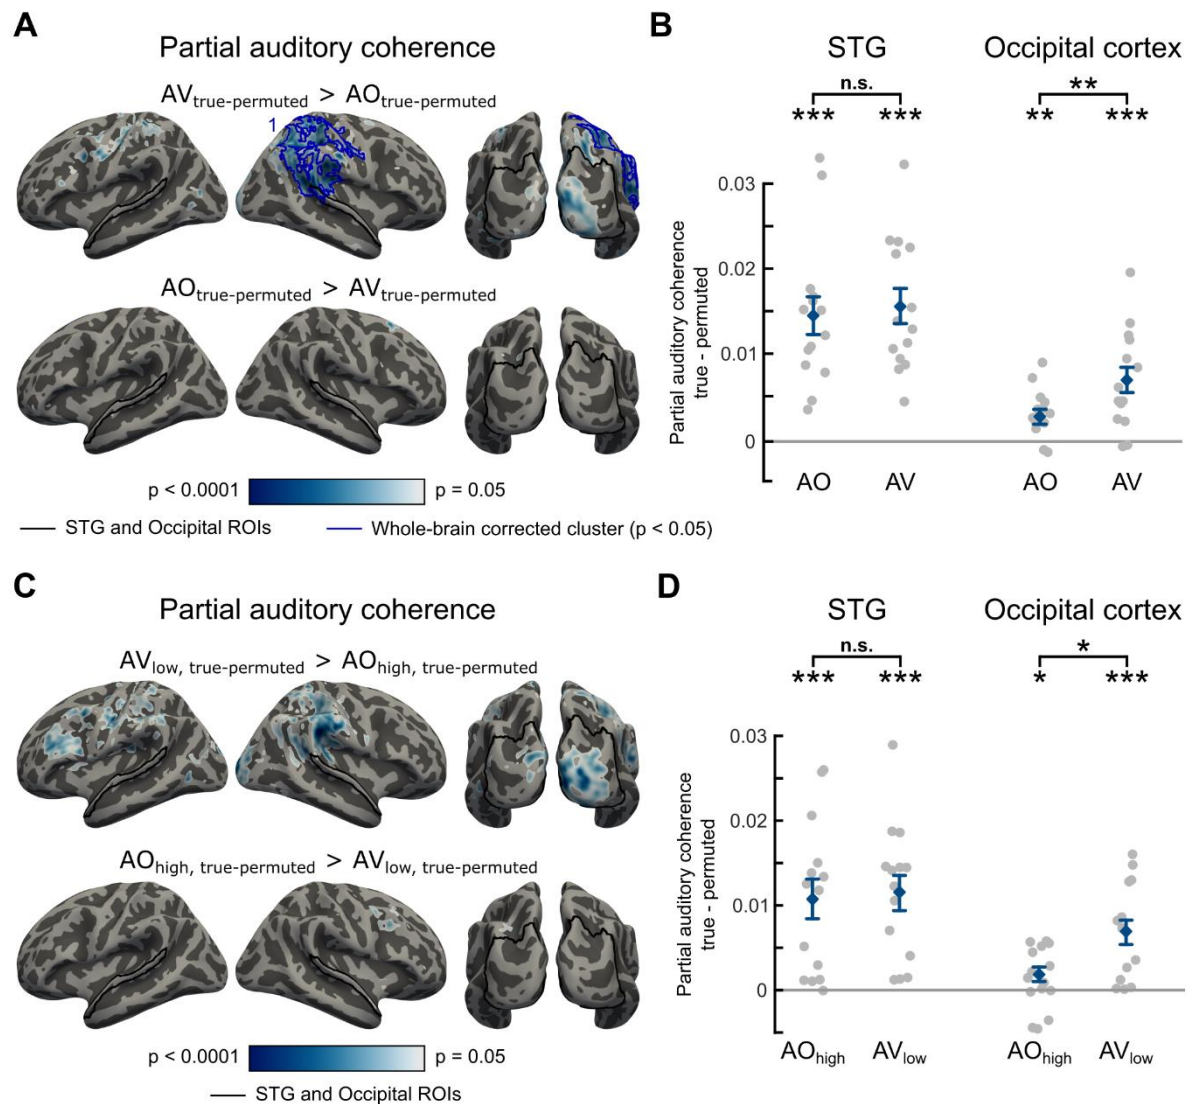

**Figure 5.** Cross-modal influences on auditory phase locking in auditory and visual areas. Effect of visual speech availability on auditory partial coherence, whole-brain (A, C) and ROI-based analysis (B, D). **A.** Whole-brain maps show significant effects of visual speech availability on partial auditory coherence with respect to permutation-derived null baseline averaged between 2-6 Hz (uncorrected p-values). Black outlines indicate STG and occipital ROIs, blue outlines indicate whole-brain corrected clusters (p < 0.05). **B.** Graphs depict the mean auditory partial coherence with respect to the permutation null baseline averaged between 2-6 Hz in AV and AO conditions across ROIs. Diamonds and error bars represent mean  $\pm$  SEM, grey dots represent individual data points. **C.** Whole-brain maps show significant effects of visual speech availability (controlling for speech intelligibility) on auditory partial coherence with respect to permutation-derived null baseline averaged between 2-6 Hz (uncorrected



p-values). Black outlines indicate STG and occipital ROIs, red outlines indicate whole-brain corrected clusters ( $p < 0.05$ ). **D.** Graphs depict the mean auditory partial coherence with respect to the permutation null baseline averaged between 2-6 Hz in  $AV_{low}$  and  $AO_{high}$  conditions across ROIs. Diamonds and error bars represent mean  $\pm$  SEM, grey dots represent individual data points. The clusters supporting the whole-brain corrected significant results are numbered and further details are presented in Table 1. (ROI: region of interest, STG: superior temporal gyrus, AO: audio-only, AV: audio-visual, n.s.: not significant, \*  $p < 0.05$ , \*\*  $p < 0.01$ , \*\*\*  $p < 0.001$ )

Next, we compared cross-modal and unimodal effects of auditory and visual speech in visual and auditory ROIs (respectively). As previously shown in Figure 4B, above chance auditory phase locking is observed in occipital cortex when both auditory and visual signals are present (i.e., AV conditions) even when statistical influences of correlated visual signals are excluded (using partial coherence analysis). Comparison of AV and AO conditions further confirms that auditory phase-locking is enhanced by the presence of visual speech: partial coherence with auditory signals was greater in AV conditions than in AO conditions ( $t(13) = 3.017$ , two-tailed  $p = 0.0099$ , see Fig. 5A, B). To ensure that additional auditory phase locking in occipital cortex was due to the presence of visual speech and not accompanying differences in intelligibility we compared partial coherence in  $AV_{low}$  and  $AO_{high}$  conditions that are matched for average intelligibility (see Fig. 2C). This comparison confirmed stronger phase-locking to auditory speech signals in occipital cortex when visual speech is present ( $t(13) = 2.552$ , two-tailed  $p = 0.0241$ , see Fig. 5D). However, this effect did not correlate with individual differences in intelligibility (i.e., visual speech preference index, Figure 2D) between these otherwise matched conditions (Pearson's  $r(12) = 0.095$ , two-tailed  $p = 0.746$ ). Despite this beneficial effect of visual speech, auditory phase-locking remains reliable in occipital cortex even when only auditory speech signals are present. We see significantly greater partial auditory coherence in AO conditions (i.e.,  $AO_{high}$  and  $AO_{low}$  combined) than in a null baseline computed by permuting the assignment of speech envelopes to MEG data (mean  $\pm$  SEM =  $0.0026 \pm 0.0009$ ,  $t(13) = 2.906$ , one-tailed  $p = 0.0061$ ).

These cross-modal influences were less apparent in our auditory ROI. Comparison of AV and AO conditions showed no evidence that auditory partial coherence in the STG was influenced by the presence of visual speech when high and low clarity speech conditions were combined ( $t(13) = 0.809$ , two-tailed  $p = 0.4329$ , see Fig. 5B) or when comparing intelligibility-matched  $AV_{\text{low}}$  and  $AO_{\text{high}}$  conditions ( $t(13) = 0.370$ , two-tailed  $p = 0.7173$ ). Partial auditory coherence in the STG is greater than in the permutation baseline both in AV conditions (shown previously in Fig. 4B) and in AO conditions (mean  $\pm$  SEM =  $0.0145 \pm 0.0023$ ,  $t(13) = 6.258$ , one-tailed  $p < 0.0001$ , Fig. 5B).

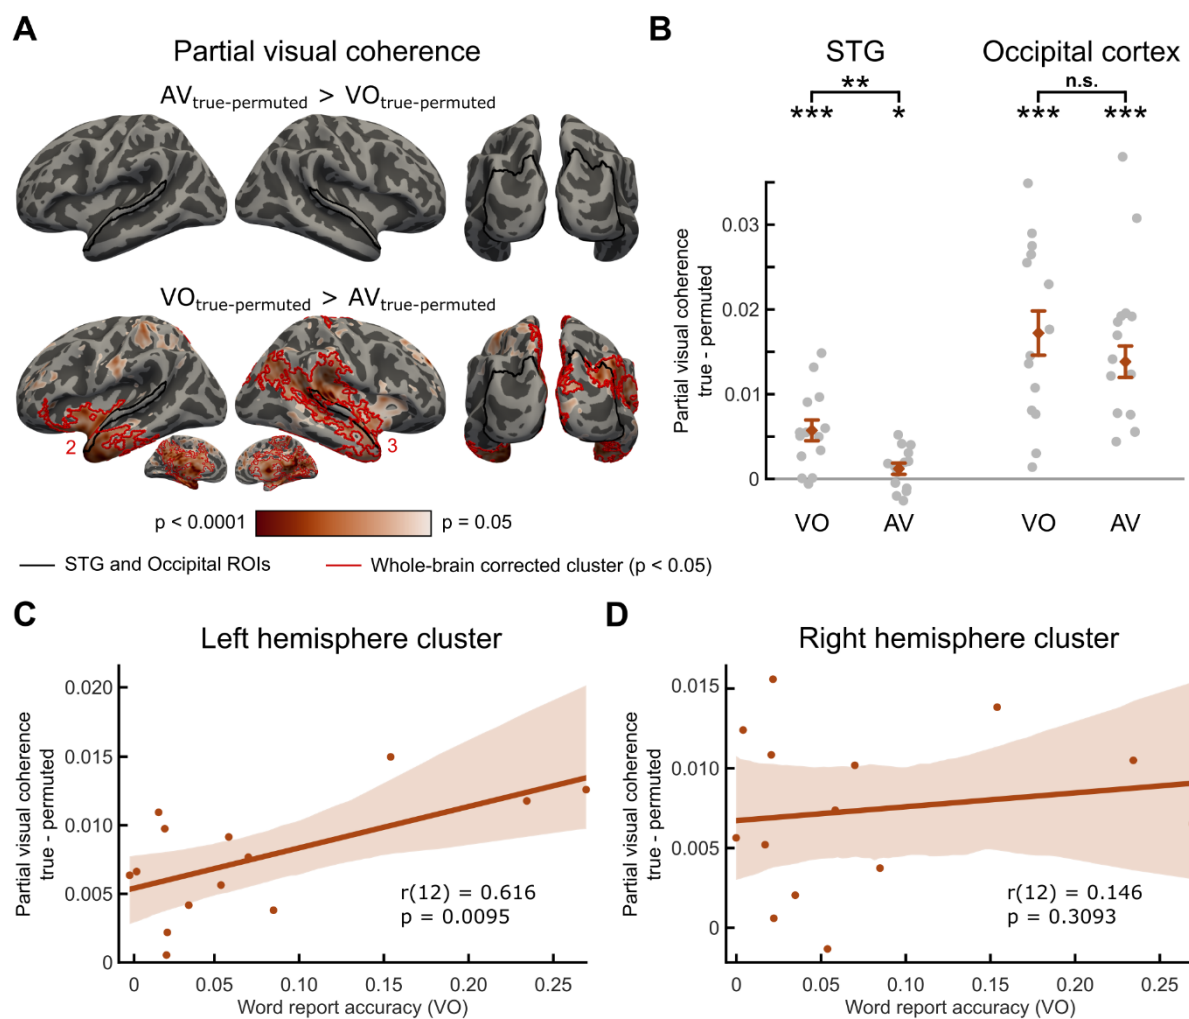

**Figure 6.** Cross modal influences on visual phase locking in auditory and visual areas. Effect of auditory speech availability on visual phase coherence, whole-brain (A) and ROI-based analysis (B). **A.** Whole-brain maps show significant effects of auditory speech availability (in both directions) on partial visual coherence with respect to permutation-derived null baseline averaged between 2-6 Hz (uncorrected

p-values). Black outlines indicate STG and occipital ROIs, red outlines indicate whole-brain corrected clusters ( $p < 0.05$ ). **B.** Graphs depict the mean auditory partial coherence with respect to the permutation null baseline averaged between 2-6 Hz in AV and VO conditions across ROIs. Diamonds and error bars represent mean  $\pm$  SEM, grey dots represent individual data points. The clusters supporting the whole-brain corrected significant results are numbered and further details are presented in Table 1. **C** and **D.** The relationship between the effect of auditory speech on visual partial coherence (i.e.,  $VO_{\text{true-perm}} - AV_{\text{true-perm}}$ ) with word report accuracy in VO across participants in the left (C) and right hemisphere (D) clusters (as shown in panel A). Solid lines depict the fitted linear trend, shaded area depicts the 95% CI based on 1000 bootstrap samples. (ROI: region of interest, STG: superior temporal gyrus, AV: audio-visual, VO: visual-only, n.s.: not significant, \*  $p < 0.05$ , \*\*  $p < 0.01$ , \*\*\*  $p < 0.001$ )

Cross-modal and unimodal conditions can also be assessed by comparing AV speech conditions (as before) with VO conditions in which auditory signals are absent. For these comparisons we subsampled trials from the two AV conditions to ensure that both conditions include an equal number of trials. Significant phase locking to visual speech signals in STG was seen in the presence of both auditory and visual speech that narrowly exceeded the permutation baseline (Fig. 6B, mean  $\pm$  SEM =  $0.0012 \pm 0.0007$ ,  $t(13) = 1.783$ , one-tailed  $p = 0.049$ ). We had previously observed that this effect was not reliable when the full set of AV trials was analysed (see Fig. 4B) and hence interpret this finding with caution. Nonetheless, comparisons of results from the subsampled AV condition and VO condition are informative since this comparison is matched for the number of trials. We observed reliable visual phase coherence in the STG even in the absence of auditory speech (i.e., in the VO condition). This is indicated by significant partial visual coherence with respect to the permutation null baseline (mean  $\pm$  SEM =  $0.0056 \pm 0.0013$ ,  $t(13) = 4.499$ , one-tailed  $p = 0.0003$ ). Indeed, visual phase locking in STG was greater in the absence of auditory speech than when it was present ( $VO > AV$ , Fig. 6B,  $t(13) = 3.886$ , two-tailed  $p = 0.0019$ ). This was the opposite outcome to that previously reported for auditory phase locking in occipital cortex (Fig. 5D). Greater phase-locking to visual speech signals

in auditory cortex during silent lip-reading might suggest that speech signals are reinstated or filled-in from visual input. We will expand on this finding in the discussion. However, this effect did not reliably correlate with individual differences in lip reading (Pearson's  $r(12) = -0.220$ , two-tailed  $p = 0.450$ ).

In occipital cortex (Fig. 6B), we also observed significant partial visual coherence above the permutation baseline both in AV conditions (mean  $\pm$  SEM =  $0.0138 \pm 0.0020$ ,  $t(13) = 6.954$ , one-tailed  $p < 0.0001$ , confirming a finding shown for the full set of trials in Fig. 4B) and VO conditions (mean  $\pm$  SEM =  $0.0173 \pm 0.0028$ ,  $t(13) = 6.171$ , one-tailed  $p < 0.0001$ ). However, in contrast to the STG, in occipital cortex there was no evidence that phase-locking to visual speech (partial coherence) was influenced by the presence of auditory speech since VO and AV conditions did not differ ( $t(13) = -1.978$ , two-tailed  $p = 0.0695$ ).

To make sure we are not overlooking other effects through spatially restrictive ROI analyses, we also report equivalent comparisons of cross-modal and unimodal speech conditions using whole-brain cluster correction for multiple comparisons. We contrasted whole-brain maps of partial auditory coherence relative to permutation baseline in AV vs. AO conditions and partial visual coherence relative to permutation baseline in AV vs. VO conditions. We found reliable whole-brain corrected effect of visual speech on auditory partial coherence (i.e.,  $AV_{\text{true-perm}} > AO_{\text{true-perm}}$ ) which was supported by a right parietal cluster (one-tailed  $p = 0.0086$ , cluster 1 in Fig. 5A and Table 1). However, this difference failed to reach corrected significance when intelligibility matched conditions ( $AV_{\text{low}}$  and  $AO_{\text{high}}$ ) were compared (Fig. 5C) and did not correlate with individual differences in visual preference index ( $r(12) = 0.144$ , two-tailed  $p = 0.6231$ ). Furthermore, we also found reliable whole-brain corrected increase in visual phase-locking for conditions in which auditory speech was absent versus present (i.e.,  $VO_{\text{true-perm}} > AV_{\text{true-perm}}$ ) supported by two large clusters, one in each hemisphere: a left anterior-temporal cluster extending to the midline (one-tailed  $p = 0.0008$ , cluster 2 in Fig. 6A and Table 1) and a right temporal and parietal cluster extending to midline structures (one-tailed  $p = 0.0002$ , cluster 3 in Fig. 6A and Table 1). This observation further confirms findings from ROI analyses (Fig. 6B) that

visual speech signals during silent lip reading lead to increased phase-locking in auditory and other language-related brain areas. This effect correlates with individual differences in word report for silent speech (lip reading) in the left hemisphere ( $r(12) = 0.616$ , one-tailed  $p = 0.0095$ , Fig. 6C), but not in the right hemisphere ( $r(12) = 0.146$ , one-tailed  $p = 0.3093$ , Fig. 6D).

| Cluster | Depicted in | Contrast                                                | Vertices (n) | Region                                                       | Statistic (summed t-values) | p-value (whole-brain corrected) |
|---------|-------------|---------------------------------------------------------|--------------|--------------------------------------------------------------|-----------------------------|---------------------------------|
| 1       | Figure 5A   | $AV_{\text{true-permuted}} > AO_{\text{true-permuted}}$ | 1068         | Right parietal                                               | 3200.6                      | 0.0086                          |
| 2       | Figure 6A   | $VO_{\text{true-permuted}} > AV_{\text{true-permuted}}$ | 2255         | Left anterior-temporal, extending to midline structures      | 7613.8                      | 0.0008                          |
| 3       | Figure 6A   | $VO_{\text{true-permuted}} > AV_{\text{true-permuted}}$ | 3153         | Right temporal and parietal, extending to midline structures | 9490.1                      | 0.0002                          |

Table 1. Descriptions and summary statistics of whole-brain analysis clusters.

For completeness, we also examined the effect of acoustic clarity (high vs. low) on phase locking to auditory and visual speech in all conditions containing auditory speech signals (i.e.,  $AO_{\text{high}}$ ,  $AO_{\text{low}}$ ,  $AV_{\text{high}}$  and  $AV_{\text{low}}$ ). Neither whole brain, nor ROI-based analysis in occipital cortex and STG identified reliable effects of acoustic clarity on phase locking.

587

## 588 Discussion

589 Viewing the face of a conversation partner greatly improves speech comprehension especially under  
 590 adverse listening conditions (Sumbly and Pollack, 1954; Erber, 1975; Summerfield et al., 1992). We  
 591 provide MEG evidence that visual and auditory speech signals are tracked by brain responses during  
 592 speech comprehension (Schroeder et al., 2008; Peelle and Sommers, 2015). Furthermore, neural  
 593 tracking of visual and auditory speech components is affected by acoustic clarity and the availability  
 594 of visual speech. Both increased acoustic clarity and the presence of visual speech improved  
 595 behavioural measures of speech comprehension. We also found individual differences in the extent  
 596 to which listeners benefitted from visual speech compared to clearer auditory speech. This visual  
 597 preference index correlated with participants' lip reading ability (Fig. 2C and D). These findings are in  
 598 line with other results supporting a link between individual differences in lipreading ability and audio-  
 599 visual benefit in speech comprehension (MacLeod & Summerfield, 1987). However, comparisons of  
 600 phase-locked MEG responses during silent lipreading and audio-visual benefit show differences  
 601 between auditory and visual responses which might imply distinct neural mechanisms supporting  
 602 these two uses of visual speech.

603 Our basic coherence analysis between MEG and speech signals identified bilateral and posterior  
 604 sensors phase-locked to auditory and visual speech, respectively (Fig. 3A). Whole-brain analysis of  
 605 source localized MEG responses revealed that auditory speech entrained bilateral temporal, parietal,  
 606 and inferior frontal areas, while visual speech entrained bilateral occipital areas (Fig. 3B). For audio-  
 607 visual speech, these areas were entrained more strongly by their respective speech modality (i.e.,  
 608 temporal and parietal areas by auditory speech; occipital areas by visual speech), even when phase-  
 609 locking to the other speech signal was partialled out (Fig. 4A). These results are comparable with the  
 610 basic entrainment effects observed in previous studies (Luo et al., 2010; Park et al., 2016; Micheli et  
 611 al., 2020). Our more detailed analysis focused on processing of audio-visual speech in auditory and

visual sensory areas. Based on previous neurophysiological and brain imaging studies, the most consistently identified sensory regions are STG for auditory speech and occipital cortex (including lateral extrastriate areas) for visual speech (see Beauchamp, 2016 for a review). In the following paragraphs we focus on entrainment effects observed in these two ROIs and consider the nature of the cross-modal influences shown in auditory and visual regions respectively.

### Entrainment to auditory signals in visual cortex

When responding to audio-visual speech, visual cortex reliably tracked both visual and auditory speech signals (Fig. 4B). Although greater phase-locking is observed for visual than for auditory signals (Fig. 4A, B), we also observed significant phase coherence between visual cortex and auditory speech in audio-visual speech conditions (Fig. 4B) and in the absence of visual speech (Fig. 5B and D). A recent study using electrocorticography similarly demonstrated that medial occipital cortex exhibit reliable auditory envelope tracking in the absence of visual speech (Micheli et al., 2020). Other studies have suggested that visual cortex represents the unheard auditory speech during silent lipreading in the form of its amplitude envelope (Hauswald et al., 2018) and higher-level linguistic feature representations (Nidiffer et al., 2021; Suess et al., 2021). Correspondingly, we also found evidence of visual cortex tracking the unheard auditory speech envelope in silent lipreading (Fig. 4C). These findings suggest that early visual cortices contribute to processing of auditory speech even in normally-hearing and sighted participants (for relevant evidence from blind individuals see Bedny et al., 2011; Watkins et al., 2013).

Critically, however, we also found that auditory speech tracking in the occipital cortex was significantly stronger when visual speech was available (Fig. 5B). This effect has previously been reported in auditory cortex in cocktail party listening (Zion Golumbic et al., 2013). Here, we demonstrate that similar effects can be observed when only a single speaker is present, and when audio-visual and audio-only conditions are matched for intelligibility (Fig. 2C, 5D). These findings therefore support the hypothesis that visual speech signals enable better phase tracking of auditory speech (Schroeder et

al., 2008; Peelle and Sommers, 2015). However, in our study this effect was largely confined to occipital areas that are not traditionally assumed to make a key contribution to auditory speech perception.

#### Entrainment to visual signals in auditory cortex

We consistently observed phase-locking of STG regions to auditory speech signals when listening to audio-visual and audio-only speech (Fig. 3B, 4A), replicating several previous findings (Luo et al., 2010; Peelle et al., 2013; Zion Golumbic et al., 2013; Micheli et al., 2020). In contrast, however, to the bimodal speech processing we reported for visual cortex, we did not find evidence of above-chance phase-locking to visual speech in STG when both auditory and visual speech signals were available (Fig. 4B). This might suggest that previous observations of visual phase-locking in auditory brain regions (e.g. Zion Golumbic et al., 2013) are specific to cocktail party listening in which selecting between competing sound sources is required. Importantly, in our study, speech perception was enhanced by the presence of visual speech even when only a single speaker was present. Hence visual enhancement of auditory entrainment in the STG might not be so consistently associated with audio-visual speech processing.

In contrast, when only visual speech was available, auditory regions (STG) reliably tracked the visual speech envelope (Fig. 6A, B) and in left hemisphere regions visual entrainment correlated with word report (Fig. 6C). These findings are despite responses to the auditory envelope being absent in visual only conditions (Fig. 4C) and auditory envelope signals being partialled out in analyses of MEG responses in visual only conditions (Fig. 6). These findings thus support an account in which the STG only processes visual speech signals when auditory speech information is absent or unavailable. Other studies have demonstrated a similar “fill-in” mechanism in the form of neural reinstatement of noise-masked speech segments (Leonard et al., 2016; Cervantes Constantino and Simon, 2018). Top-down modulation from dorsal stream areas, including motor-related regions have also been proposed to play a role in this visual to phonological mapping (Park et al., 2016; Hauswald et al., 2018). However,



in our work, we did not observe differential entrainment of motor regions during silent lip-reading compared to audio-visual speech perception.

### Cross-modal prediction of audio and visual speech signals

Our results show that despite the parallels between silent lip reading and visual benefit to degraded speech perception, distinct neural effects are observed in these two listening situations. Visual cortex shows reliable phase-locking to auditory speech, and this auditory entrainment is enhanced during visual speech processing for audio-visual benefit, or lip-reading (i.e., with and without auditory input). In auditory cortex, however, visual speech does not produce reliable phase-locking, and the presence of visual speech in AV conditions doesn't enhance phase-locking to auditory speech signals relative to audio only conditions. Yet, we observed reliable phase-locking to visual speech signals in auditory cortex during silent lip-reading. Thus, despite the behavioural association between silent lip-reading and audio-visual benefit we see marked differences between the influence of visual speech on phase-locked neural responses in auditory and visual cortices. We here offer some tentative suggestions for the interpretation of these findings in line with predictive accounts of speech processing (Hovsepian et al., 2020; Sohoglu and Davis, 2020) and that have been applied to audio-visual speech perception (Olasagasti et al., 2015).

One interpretation of the present findings is that neural phase-locking to envelope signals provides a timing template such that visual (lip aperture) and auditory (formant frequencies) sensory signals are combined (Olasagasti et al., 2015). Indeed, the phase of cortical theta oscillations in posterior temporal and occipital cortex have been shown to determine whether auditory or visual speech cues determine perception (Th     et al., 2020), and pre-stimulus oscillatory phase (plausibly determined from visual speech) contributes to identification of ambiguous speech sounds (ten Oever and Sack, 2015). These cross-modal influences can be explained by proposing that visual speech permits predictions for the spectro-temporal properties (i.e., timing and formant frequency) of upcoming speech sounds (van Wassenhove et al., 2005; Arnal et al., 2011) and vice-versa with auditory speech

predicting visual signals (Lee and Noppeney, 2014). Auditory prediction errors (and hence auditory phase-locking) arise in visual cortical areas when degraded speech sounds cannot accurately predict visual speech cues during audio-visual speech perception. The resulting prediction errors signal viseme information (Nidiffer et al., 2021) that can be used to update higher-level interpretations and support optimal speech perception when visual and auditory stimuli must be combined (Olasagasti et al., 2015).

However, when auditory speech is absent (i.e., during silent lip-reading), we no longer observe auditory entrainment in visual cortex. Instead, we observe visual envelope cues producing entrainment of auditory brain regions. We also interpret this as arising from cross-modal predictive processes; in this case due to visually-derived predictions for expected auditory stimuli that are absent. Visually-driven prediction errors expressed in auditory regions will encode the absence of expected speech sounds (Blank and von Kriegstein, 2013) and hence drive phase locking in auditory regions. As in other situations in which speech sounds are missing or masked, these prediction errors can reinstate auditory signals and support speech perception (Leonard et al., 2016; Cervantes Constantino and Simon, 2018). Thus, cross-modal prediction errors plausibly explain the pattern of auditory and visual phase-locking observed in two different situations in which visual speech supports word report.

## Code and data availability

All analysis code and data will be available for download upon the publication of the manuscript.

## References

- Arnal LH, Wyart V, Giraud A-L (2011) Transitions in neural oscillations reflect prediction errors generated in audiovisual speech. *Nature Neuroscience* 14:797–801.
- Beauchamp MS (2016) Audiovisual Speech Integration: Neural Substrates and Behavior. In: *Neurobiology of Language* (Hickok G, Small SL, eds), pp 515–526. San Diego: Academic Press. Available at: <https://www.sciencedirect.com/science/article/pii/B9780124077942000420> [Accessed June 25, 2021].
- Bedny M, Pascual-Leone A, Dodell-Feder D, Fedorenko E, Saxe R (2011) Language processing in the occipital cortex of congenitally blind adults. *PNAS* 108:4429–4434.
- Blank H, von Kriegstein K (2013) Mechanisms of enhancing visual-speech recognition by prior auditory information. *Neuroimage* 65:109–118.
- Bourguignon M, Baart M, Kapnoula EC, Molinaro N (2020) Lip-Reading Enables the Brain to Synthesize Auditory Features of Unknown Silent Speech. *J Neurosci* 40:1053–1065.
- Brainard DH (1997) The Psychophysics Toolbox. *Spatial Vision* 10:433–436.
- Cervantes Constantino F, Simon JZ (2018) Restoration and Efficiency of the Neural Processing of Continuous Speech Are Promoted by Prior Knowledge. *Front Syst Neurosci* 12 Available at: <https://www.frontiersin.org/articles/10.3389/fnsys.2018.00056/full> [Accessed June 30, 2021].
- Chandrasekaran C, Trubanova A, Stillittano S, Caplier A, Ghazanfar AA (2009) The Natural Statistics of Audiovisual Speech. *PLOS Computational Biology* 5:e1000436.
- Davis MH, Johnsrude IS, Hervais-Adelman A, Taylor K, McGettigan C (2005) Lexical Information Drives Perceptual Learning of Distorted Speech: Evidence From the Comprehension of Noise-Vocoded Sentences. *Journal of Experimental Psychology: General* 134:222–241.
- Destrieux C, Fischl B, Dale A, Halgren E (2010) Automatic parcellation of human cortical gyri and sulci using standard anatomical nomenclature. *Neuroimage* 53:1–15.
- Ding N, Simon JZ (2014) Cortical entrainment to continuous speech: functional roles and interpretations. *Front Hum Neurosci* 8 Available at: <https://www.frontiersin.org/articles/10.3389/fnhum.2014.00311/full> [Accessed October 29, 2020].
- Erber NP (1975) Auditory-visual perception of speech. *J Speech Hear Disord* 40:481–492.
- Fischl B (2012) FreeSurfer. *NeuroImage* 62:774–781.
- Giraud A-L, Poeppel D (2012) Cortical oscillations and speech processing: emerging computational principles and operations. *Nature Neuroscience* 15:511–517.
- Gramfort A, Luessi M, Larson E, Engemann DA, Strohmeier D, Brodbeck C, Goj R, Jas M, Brooks T, Parkkonen L, Hämäläinen M (2013) MEG and EEG data analysis with MNE-Python. *Front Neurosci* 7 Available at: <https://www.frontiersin.org/articles/10.3389/fnins.2013.00267/full> [Accessed April 12, 2021].

743 Gross J, Hoogenboom N, Thut G, Schyns P, Panzeri S, Belin P, Garrod S (2013) Speech Rhythms and  
744 Multiplexed Oscillatory Sensory Coding in the Human Brain. *PLOS Biology* 11:e1001752.

745 Gross J, Kujala J, Hämäläinen M, Timmermann L, Schnitzler A, Salmelin R (2001) Dynamic imaging of  
746 coherent sources: Studying neural interactions in the human brain. *PNAS* 98:694–699.

747 Hartigan JA, Hartigan PM (1985) The Dip Test of Unimodality. *The Annals of Statistics* 13:70–84.

748 Hauswald A, Lithari C, Collignon O, Leonardelli E, Weisz N (2018) A Visual Cortical Network for Deriving  
749 Phonological Information from Intelligible Lip Movements. *Current Biology* 28:1453–1459.e3.

750 Hovsepyan S, Olasagasti I, Giraud A-L (2020) Combining predictive coding and neural oscillations  
751 enables online syllable recognition in natural speech. *Nat Commun* 11:3117.

752 Hyvarinen A (1999) Fast and robust fixed-point algorithms for independent component analysis. *IEEE*  
753 *Transactions on Neural Networks* 10:626–634.

754 Keitel A, Gross J, Kayser C (2018) Perceptually relevant speech tracking in auditory and motor cortex  
755 reflects distinct linguistic features. *PLOS Biology* 16:e2004473.

756 Kleiner M, Brainard D, Pelli D (2007) What’s new in Psychtoolbox-3? In: *Perception*, 36 (EVCP Abstract  
757 Supplement). Alesio.

758 Lakatos P, Shah AS, Knuth KH, Ulbert I, Karmos G, Schroeder CE (2005) An oscillatory hierarchy  
759 controlling neuronal excitability and stimulus processing in the auditory cortex. *J Neurophysiol*  
760 94:1904–1911.

761 Lee H, Noppeney U (2014) Temporal prediction errors in visual and auditory cortices. *Current Biology*  
762 24:R309–R310.

763 Leonard MK, Baud MO, Sjerps MJ, Chang EF (2016) Perceptual restoration of masked speech in human  
764 cortex. *Nature Communications* 7:13619.

765 Luo H, Liu Z, Poeppel D (2010) Auditory Cortex Tracks Both Auditory and Visual Stimulus Dynamics  
766 Using Low-Frequency Neuronal Phase Modulation. *PLOS Biology* 8:e1000445.

767 MacLeod A, Summerfield Q (1987) Quantifying the contribution of vision to speech perception in  
768 noise. *Br J Audiol* 21:131–141.

769 Maris E, Oostenveld R (2007) Nonparametric statistical testing of EEG- and MEG-data. *Journal of*  
770 *Neuroscience Methods* 164:177–190.

771 Mattys SL, Davis MH, Bradlow AR, Scott SK (2012) Speech recognition in adverse conditions: A review.  
772 *Language and Cognitive Processes* 27:953–978.

773 Mégevand P, Mercier MR, Groppe DM, Golumbic EZ, Mesgarani N, Beauchamp MS, Schroeder CE,  
774 Mehta AD (2020) Crossmodal Phase Reset and Evoked Responses Provide Complementary  
775 Mechanisms for the Influence of Visual Speech in Auditory Cortex. *J Neurosci* 40:8530–8542.

776 Micheli C, Schepers IM, Ozker M, Yoshor D, Beauchamp MS, Rieger JW (2020) Electrocorticography  
777 reveals continuous auditory and visual speech tracking in temporal and occipital cortex. *Eur J*  
778 *Neurosci* 51:1364–1376.

779 Nidiffer AR, Cao CZ, O’Sullivan A, Lalor EC (2021) A linguistic representation in the visual system  
780 underlies successful lipreading. *bioRxiv*:2021.02.09.430299.

781 Obleser J, Kayser C (2019) Neural Entrainment and Attentional Selection in the Listening Brain. *Trends*  
782 in Cognitive Sciences Available at:  
783 <http://www.sciencedirect.com/science/article/pii/S1364661319302050> [Accessed October  
784 21, 2019].

785 Olasagasti I, Bouton S, Giraud A-L (2015) Prediction across sensory modalities: A neurocomputational  
786 model of the McGurk effect. *Cortex* 68:61–75.

787 Oostenveld R, Fries P, Maris E, Schoffelen J-M (2011) FieldTrip: Open source software for advanced  
788 analysis of MEG, EEG, and invasive electrophysiological data. *Computational Intelligence and*  
789 *Neuroscience* 2011:156869.

790 O’Sullivan AE, Crosse MJ, Di Liberto GM, Lalor EC (2017) Visual Cortical Entrainment to Motion and  
791 Categorical Speech Features during Silent Lipreading. *Front Hum Neurosci* 10 Available at:  
792 <https://www.frontiersin.org/articles/10.3389/fnhum.2016.00679/full> [Accessed June 23,  
793 2021].

794 Park H, Kayser C, Thut G, Gross J (2016) Lip movements entrain the observers’ low-frequency brain  
795 oscillations to facilitate speech intelligibility King AJ, ed. *eLife* 5:e14521.

796 Peelle JE, Davis MH (2012) Neural Oscillations Carry Speech Rhythm through to Comprehension. *Front*  
797 *Psychol* 3 Available at: <https://www.frontiersin.org/articles/10.3389/fpsyg.2012.00320/full>  
798 [Accessed January 30, 2020].

799 Peelle JE, Gross J, Davis MH (2013) Phase-locked responses to speech in human auditory cortex are  
800 enhanced during comprehension. *Cereb Cortex* 23:1378–1387.

801 Peelle JE, Sommers MS (2015) Prediction and constraint in audiovisual speech perception. *Cortex*  
802 68:169–181.

803 Rosenberg JR, Halliday DM, Breeze P, Conway BA (1998) Identification of patterns of neuronal  
804 connectivity—partial spectra, partial coherence, and neuronal interactions. *Journal of*  
805 *Neuroscience Methods* 83:57–72.

806 Schroeder CE, Lakatos P, Kajikawa Y, Partan S, Puce A (2008) Neuronal oscillations and visual  
807 amplification of speech. *Trends in Cognitive Sciences* 12:106–113.

808 Shannon RV, Zeng F-G, Kamath V, Wygonski J, Ekelid M (1995) Speech Recognition with Primarily  
809 Temporal Cues. *Science* 270:303–304.

810 Sohoglu E, Davis MH (2020) Rapid computations of spectrotemporal prediction error support  
811 perception of degraded speech King AJ, Kok P, Kok P, Press C, Lalor EC, eds. *eLife* 9:e58077.

812 Sohoglu E, Peelle JE, Carlyon RP, Davis MH (2014) Top-down influences of written text on perceived  
813 clarity of degraded speech. *Journal of Experimental Psychology: Human Perception and*  
814 *Performance* 40:186–199.

815 Suess N, Hauswald A, Zehentner V, Depireux J, Herzog G, Rösch S, Weisz N (2021) Influence of linguistic  
816 properties and hearing impairment on lip reading skills in the German language. Available at:  
817 <https://psyarxiv.com/rcfxv/> [Accessed March 12, 2021].

818 Sumbly WH, Pollack I (1954) Visual Contribution to Speech Intelligibility in Noise. The Journal of the  
819 Acoustical Society of America 26:212–215.

820 Summerfield Q, Bruce V, Cowey A, Ellis AW, Perrett DI (1992) Lipreading and audio-visual speech  
821 perception. Philosophical Transactions of the Royal Society of London Series B: Biological  
822 Sciences 335:71–78.

823 Taulu S, Simola J (2006) Spatiotemporal signal space separation method for rejecting nearby  
824 interference in MEG measurements. Phys Med Biol 51:1759–1768.

825 ten Oever S, Sack AT (2015) Oscillatory phase shapes syllable perception. PNAS 112:15833–15837.

826 Thézé R, Giraud A-L, Mégevand P (2020) The phase of cortical oscillations determines the perceptual  
827 fate of visual cues in naturalistic audiovisual speech. Science Advances 6:eabc6348.

828 Thomas SM, Jordan TR (2004) Contributions of Oral and Extraoral Facial Movement to Visual and  
829 Audiovisual Speech Perception. Journal of Experimental Psychology: Human Perception and  
830 Performance 30:873–888.

831 van Wassenhove V, Grant KW, Poeppel D (2005) Visual speech speeds up the neural processing of  
832 auditory speech. PNAS 102:1181–1186.

833 Voss RF, Clarke J (1975) ‘1/ f noise’ in music and speech. Nature 258:317–318.

834 Watkins KE, Shakespeare TJ, O’Donoghue MC, Alexander I, Ragge N, Cowey A, Bridge H (2013) Early  
835 Auditory Processing in Area V5/MT+ of the Congenitally Blind Brain. J Neurosci 33:18242–  
836 18246.

837 Yi A, Wong W, Eizenman M (2013) Gaze patterns and audiovisual speech enhancement. J Speech Lang  
838 Hear Res 56:471–480.

839 Zion Golumbic E, Cogan GB, Schroeder CE, Poeppel D (2013) Visual Input Enhances Selective Speech  
840 Envelope Tracking in Auditory Cortex at a “Cocktail Party.” J Neurosci 33:1417–1426.

841 Zoefel B, Allard I, Anil M, Davis MH (2020) Perception of Rhythmic Speech Is Modulated by Focal  
842 Bilateral Transcranial Alternating Current Stimulation. Journal of Cognitive Neuroscience  
843 32:226–240.

844 Zoefel B, Archer-Boyd A, Davis MH (2018) Phase Entrainment of Brain Oscillations Causally Modulates  
845 Neural Responses to Intelligible Speech. Current Biology 28:401-408.e5.

846
